# Supplementary material for: Informing antimicrobial stewardship with explainable AI
Source: PubMed Central journal article supplement (PMC9931350; doi:10.1371/journal.pdig.0000162), 2023-01-05

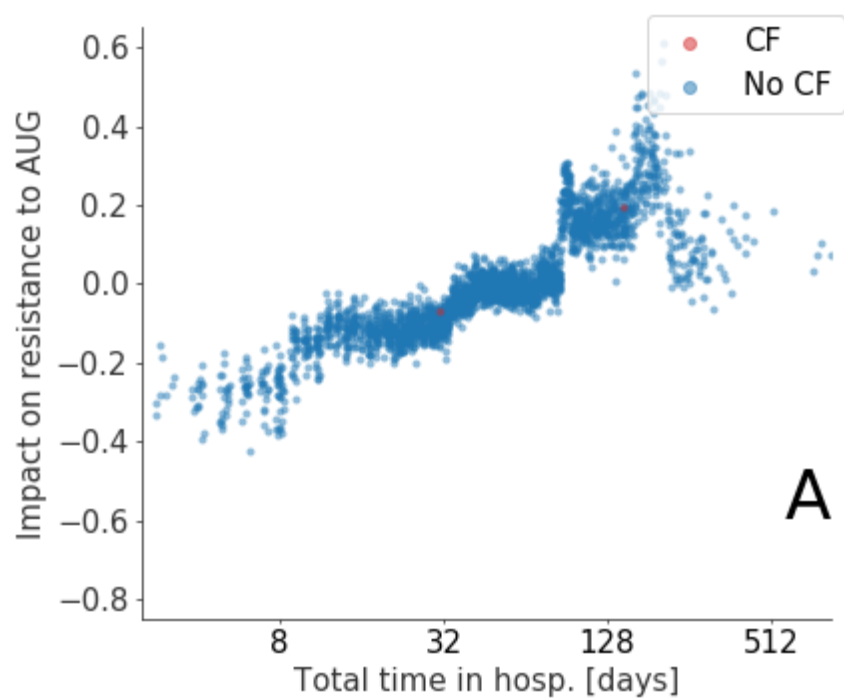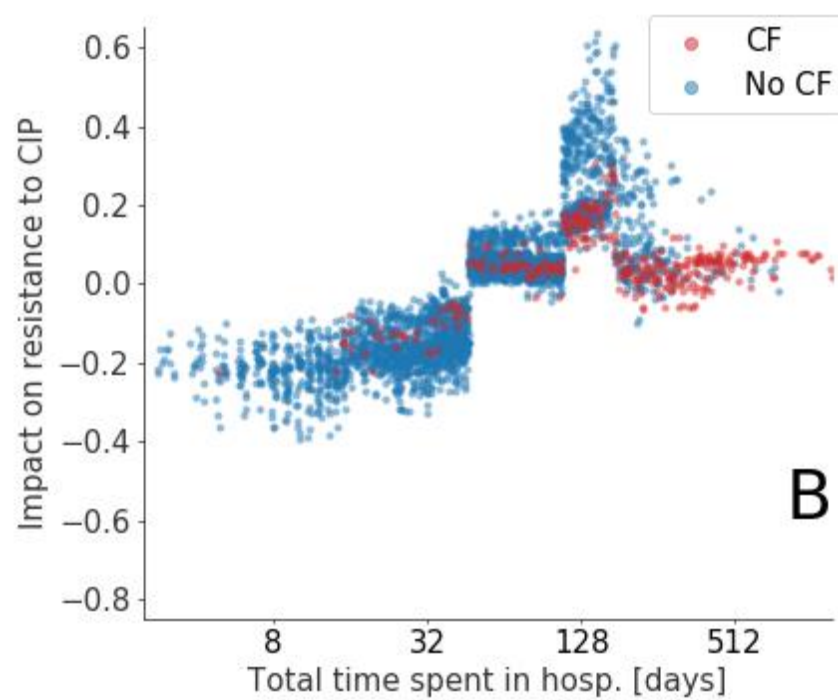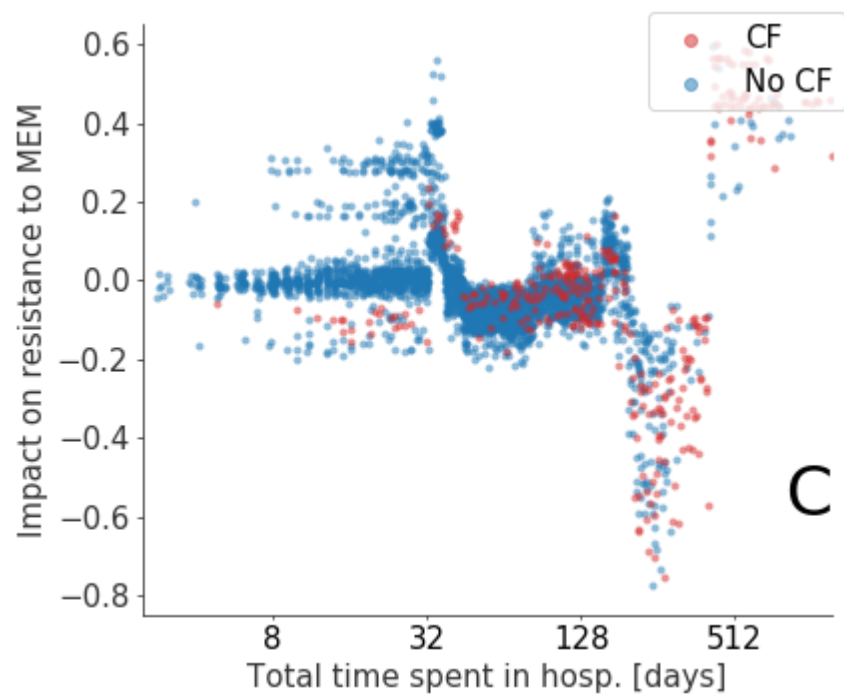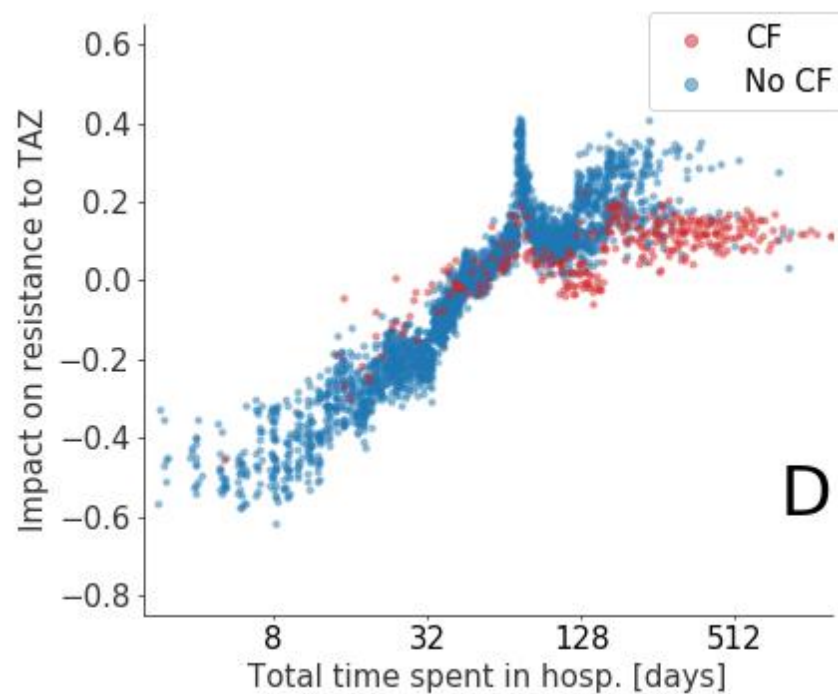

Supplement: pdig.0000162.s013.pdf [file pdig.0000162.s013.pdf]
